# Supplementary figures and images for: Small molecule inhibition of Csk alters affinity recognition by T cells
Source: eLife journal article supplement (doi:10.7554/elife.08088), 2015-08-24

Figure 4 – figure supplement 1

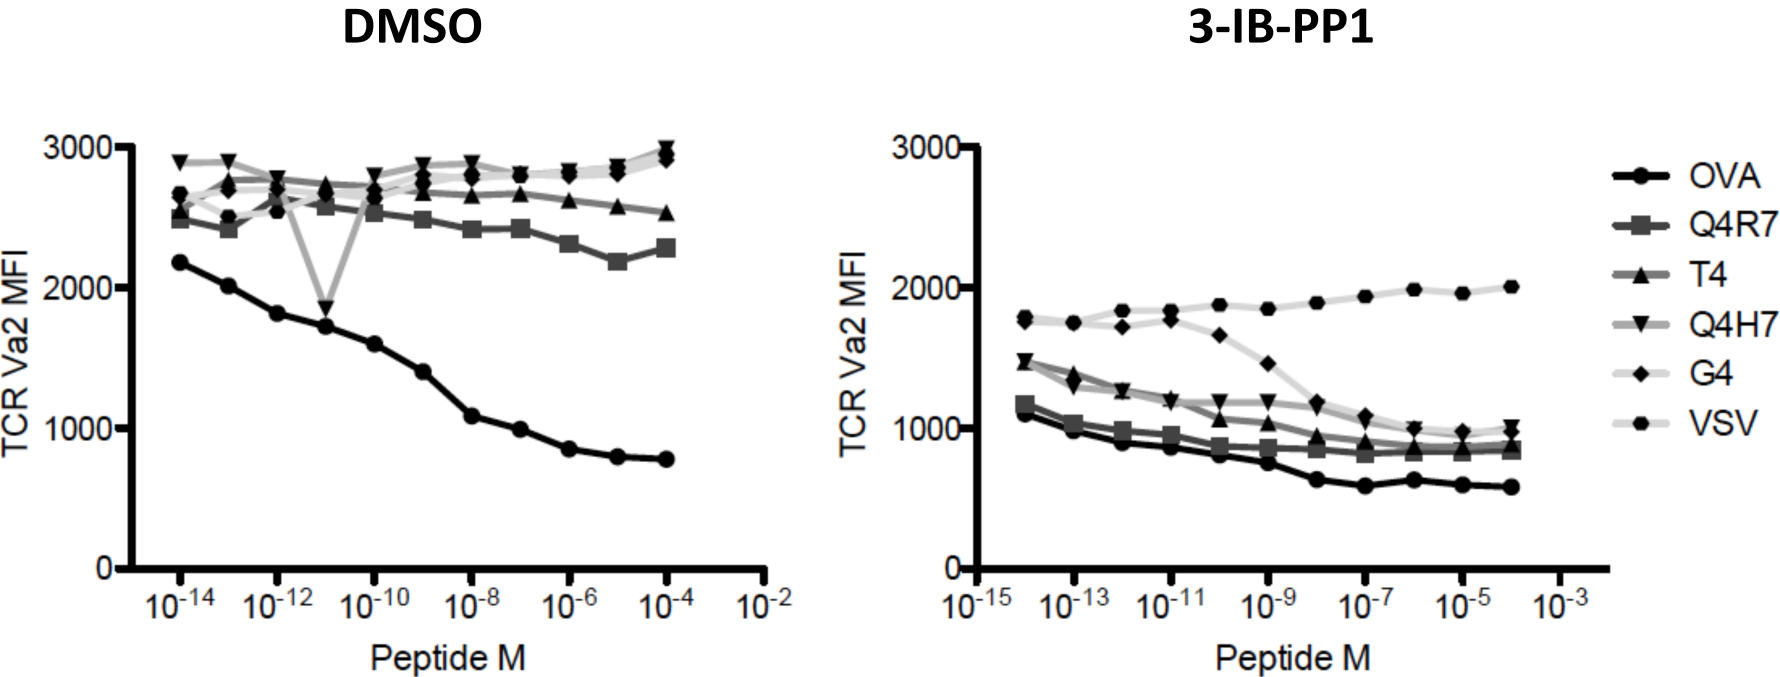

Supplement: supp [file elife-08088-supp-v1.zip]

Figure 1 - figure supplement 1

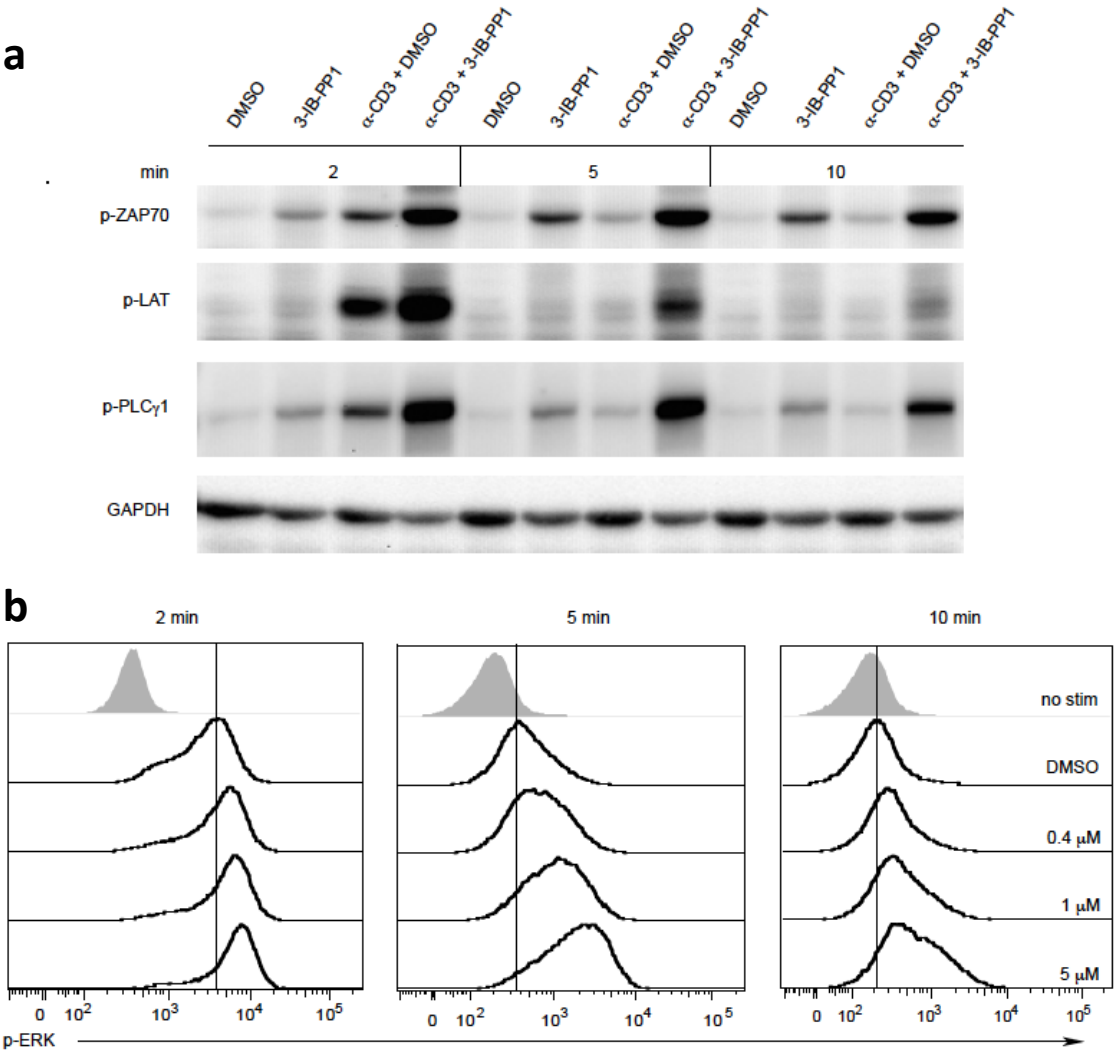

Supplement: supp [file elife-08088-supp-v1.zip]

Figure 3 – figure supplement 1

**a**

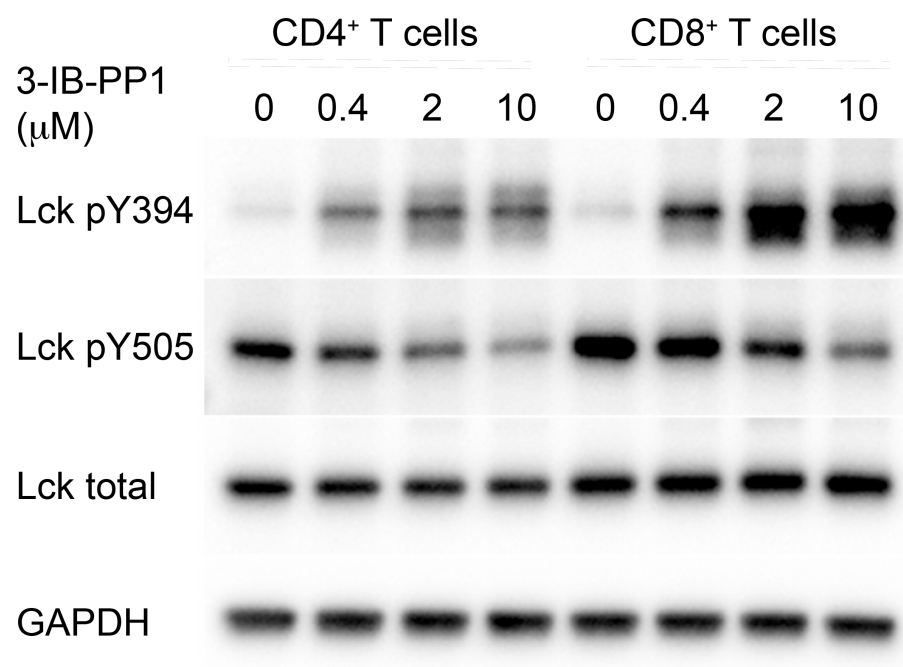

**b**

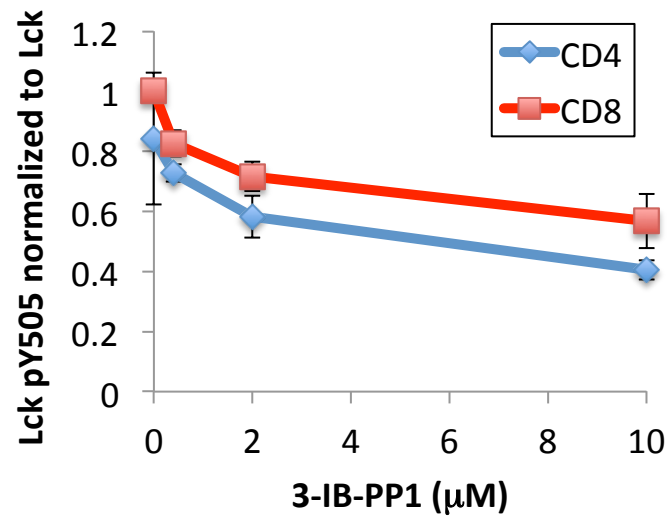

**c**

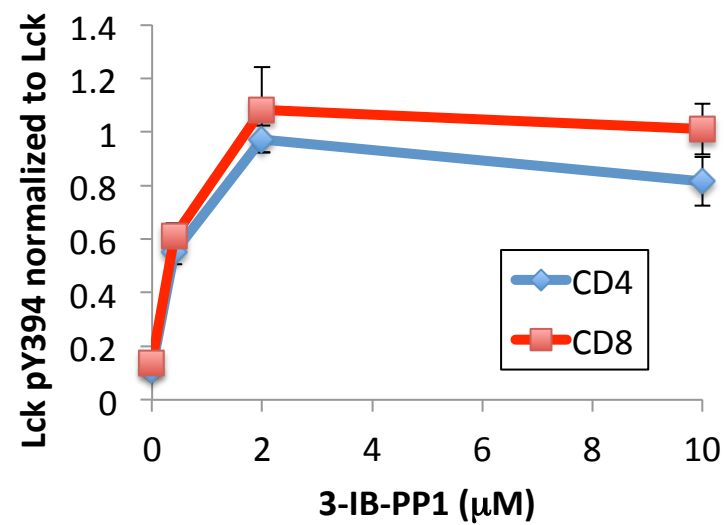

Supplement: supp [file elife-08088-supp-v1.zip]

Figure 2 – figure supplement 1

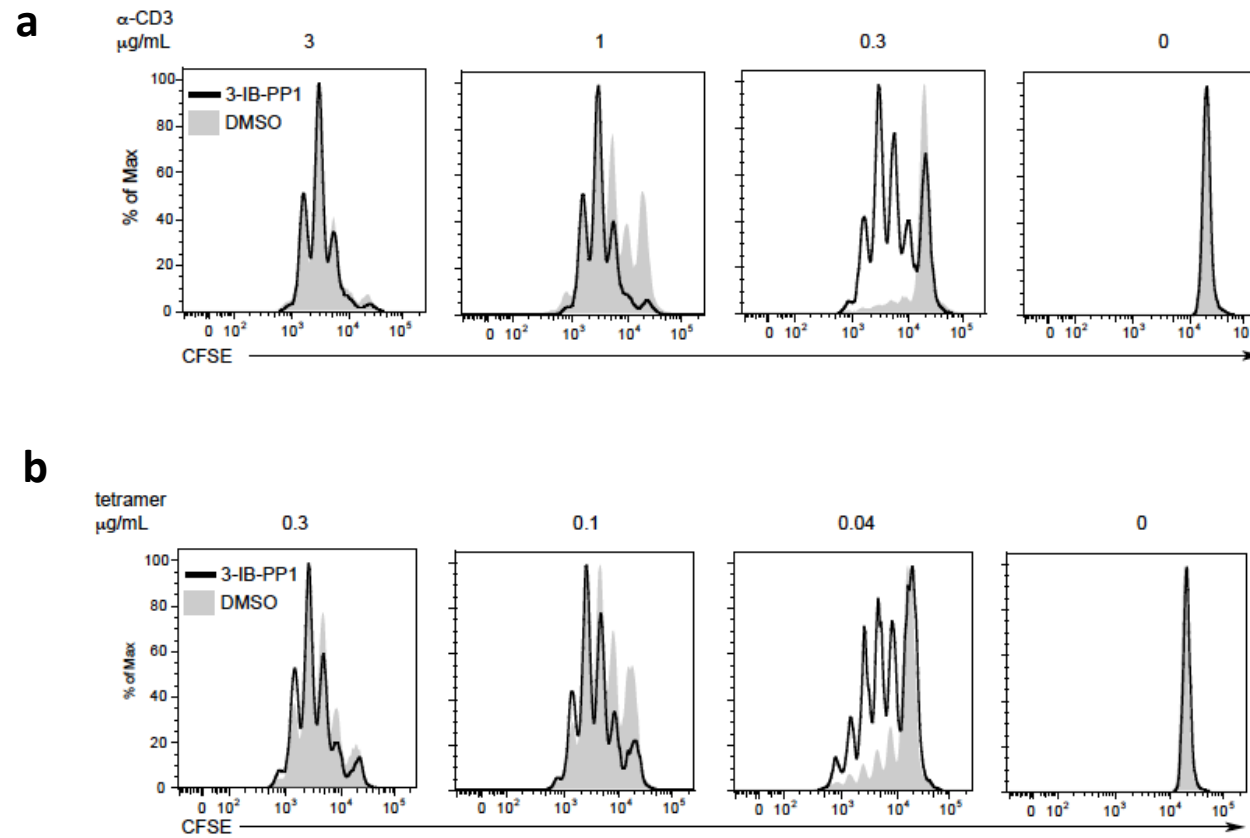

Supplement: supp [file elife-08088-supp-v1.zip]
